# Supplementary material for: Antioxidant Activity Evaluation of Dietary Flavonoid Hyperoside Using Saccharomyces Cerevisiae as a Model
Source: Molecules. 2019 Feb 22;24(4):788. doi: 10.3390/molecules24040788 (PMC6412469; doi:10.3390/molecules24040788)
Supplement: Supplementary file 1 [file molecules-24-00788-s001.xlsx]

## Sheet: Sheet1
				Figure S1 The Structure of Hyperoside
			Figure. S2 The 1H-NMR spectra (DMSO, 400 MHz) of hyperoside
			Figure. S3 The 13C-NMR spectra (DMSO, 100 MHz) of hyperoside
			Table S1 1H and 13C NMR spectroscopic data of hyperoside (DMSO-d6, δ ppm, 400 MHz)
				No	1H	13C
				2	—	156.2
				3	O-Gal	133.5
				4	—	177.5
				5	OH	161.2
				6	6.22d	98.6
				7	OH	164.1
				8	6.42d	93.5
				9	—	156.3
				10	—	103.9
				1'	—	121.1
				2'	7.55d	115.2
				3'	OH	144.8
				4'	OH	148.4
				5'	6.82d	115.9
				6'	7.66dd	122
				1''	—	101.8
				2''	—	71.2
				3''	—	73.2
				4''	—	67.9
				5''	—	75.8
				6''	—	60.1
			Figure. S4 The HPLC spectra of hyperoside
			Table S2. The analytical result of hyperoside
			Test Item		Specification		Results
			Appearance		Yellow powder		Yellow powder
			Loss on drying		＜3.0%		0.0128
			Purity (HPLC-DAD,360 nm)*		≥98.0%		0.9913
			Mass		464.379 ± 1		conforms
			NMR		comply with the structure		conforms
			* The HPLC Chromatography is Figure S4.
